# Supplementary material
Source: PubMed Central journal article supplement (PMC11073266)
Supplement: 18_2023_4919_MOESM4_ESM.pdf [file 18_2023_4919_MOESM4_ESM.pdf]

| Gene       | DES over veh (log2FC) | E2 response, early | E2 response, late |
|------------|-----------------------|--------------------|-------------------|
| Bcl11b     | 10.22                 | yes                |                   |
| Reep1      | 8.00                  | yes                |                   |
| Inhbb      | 7.91                  | yes                |                   |
| Mdk        | 7.58                  |                    | yes               |
| Unc13b     | 7.28                  |                    | yes               |
| Cxcl12     | 7.25                  | yes                | yes               |
| Mapk13     | 6.84                  |                    | yes               |
| Pdlim3     | 5.94                  | yes                | yes               |
| Gfra1      | 5.89                  | yes                |                   |
| Ar         | 5.59                  | yes                |                   |
| Lrig1      | 5.47                  | yes                |                   |
| Npy1r      | 5.01                  | yes                | yes               |
| Adcy9      | 4.72                  | yes                |                   |
| Olfm1      | 4.23                  | yes                | yes               |
| Greb1      | 4.11                  | yes                |                   |
| Homer2     | 3.81                  |                    | yes               |
| Tpd52l1    | 3.69                  | yes                | yes               |
| Tiam1      | 3.59                  | yes                | yes               |
| Krt18      | 3.39                  | yes                |                   |
| Trim29     | 3.26                  |                    | yes               |
| Wisp2      | 3.13                  | yes                | yes               |
| Egr3       | 3.09                  | yes                | yes               |
| Tspan13    | 3.05                  |                    | yes               |
| Mppd2      | 2.98                  | yes                |                   |
| Tnnc1      | 2.50                  |                    | yes               |
| Cd9        | 2.48                  |                    | yes               |
| Tgm2       | 2.41                  | yes                |                   |
| Gale       | 2.25                  |                    | yes               |
| Areg       | 2.13                  | yes                | yes               |
| Mybl1      | 2.01                  | yes                |                   |
| Tubb2b     | 2.01                  | yes                |                   |
| Slc24a3    | 1.86                  | yes                | yes               |
| Scarb1     | 1.84                  | yes                | yes               |
| Sgk1       | 1.82                  |                    | yes               |
| Nrip1      | 1.63                  | yes                | yes               |
| Rps6ka2    | 1.61                  | yes                | yes               |
| Sybu       | 1.61                  | yes                |                   |
| Pla2g16    | 1.56                  | yes                | yes               |
| Fdft1      | 1.52                  | yes                | yes               |
| Pgr        | 1.51                  | yes                | yes               |
| Zfp36      | 1.49                  |                    | yes               |
| Myof       | 1.47                  | yes                | yes               |
| B4galt1    | 1.44                  | yes                |                   |
| Ccnd1      | 1.40                  | yes                | yes               |
| Rrp12      | 1.40                  | yes                |                   |
| Hspb8      | 1.36                  | yes                | yes               |
| Klf4       | 1.31                  | yes                | yes               |
| Flnb       | 1.31                  | yes                | yes               |
| Abca3      | 1.28                  | yes                | yes               |
| Ugdh       | 1.21                  |                    | yes               |
| Sema3b     | 1.20                  | yes                | yes               |
| Lamc2      | 1.16                  |                    | yes               |
| Igf1r      | 1.14                  | yes                |                   |
| Igfbp4     | 1.13                  | yes                | yes               |
| Endod1     | 1.13                  | yes                |                   |
| Pdzk1      | 1.12                  | yes                | yes               |
| Fasn       | 1.10                  | yes                |                   |
| Nbl1       | 1.08                  | yes                | yes               |
| Bcl2       | 1.02                  | yes                | yes               |
| St6galnac2 | 1.01                  |                    | yes               |

| Gene    | DES over veh (log2FC) | E2 response, early | E2 response, late |
|---------|-----------------------|--------------------|-------------------|
| Tbc1d30 | -12.56                | yes                |                   |
| Plxnb1  | -6.20                 |                    | yes               |
| Prkar2b | -4.06                 |                    | yes               |
| Scube2  | -3.35                 |                    | yes               |
| Dhrs3   | -2.41                 | yes                |                   |
| Ablim1  | -2.40                 | yes                |                   |
| Top2a   | -2.32                 |                    | yes               |
| Ligl2   | -2.31                 |                    | yes               |
| Syngn1  | -2.28                 | yes                |                   |
| Scnn1a  | -2.15                 | yes                | yes               |
| Frk     | -2.08                 | yes                | yes               |
| Dlc1    | -2.01                 | yes                |                   |
| Cdc20   | -1.77                 |                    | yes               |
| Kif20a  | -1.72                 |                    | yes               |
| Gja1    | -1.63                 | yes                |                   |
| Kazn    | -1.57                 | yes                |                   |
| Svil    | -1.55                 | yes                |                   |
| Cpe     | -1.49                 |                    | yes               |
| Itpk1   | -1.48                 | yes                | yes               |
| Nab2    | -1.47                 |                    | yes               |
| Tgif2   | -1.35                 | yes                |                   |
| Stil    | -1.29                 |                    | yes               |
| Impa2   | -1.16                 |                    | yes               |
| Sec14l2 | -1.09                 | yes                |                   |
| Stc2    | -1.09                 | yes                |                   |
| Dnajc12 | -1.03                 |                    | yes               |
| Slc16a1 | -1.02                 | yes                | yes               |

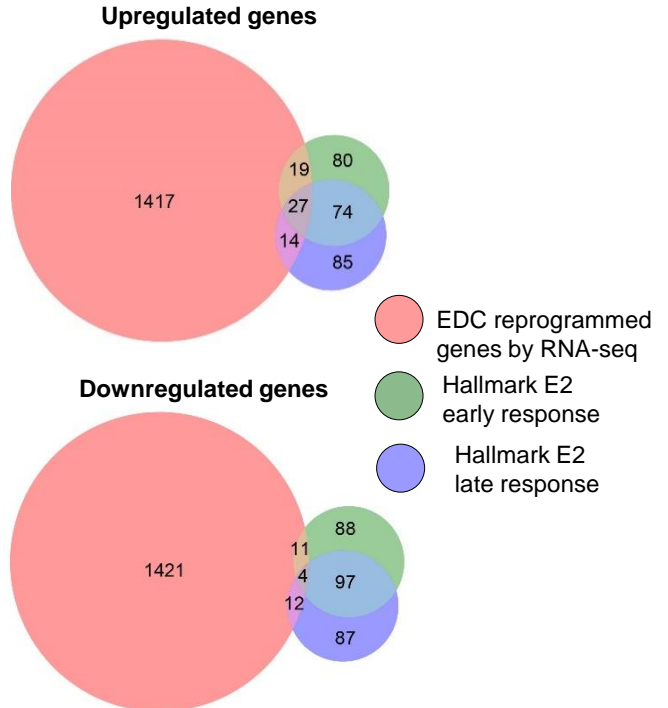

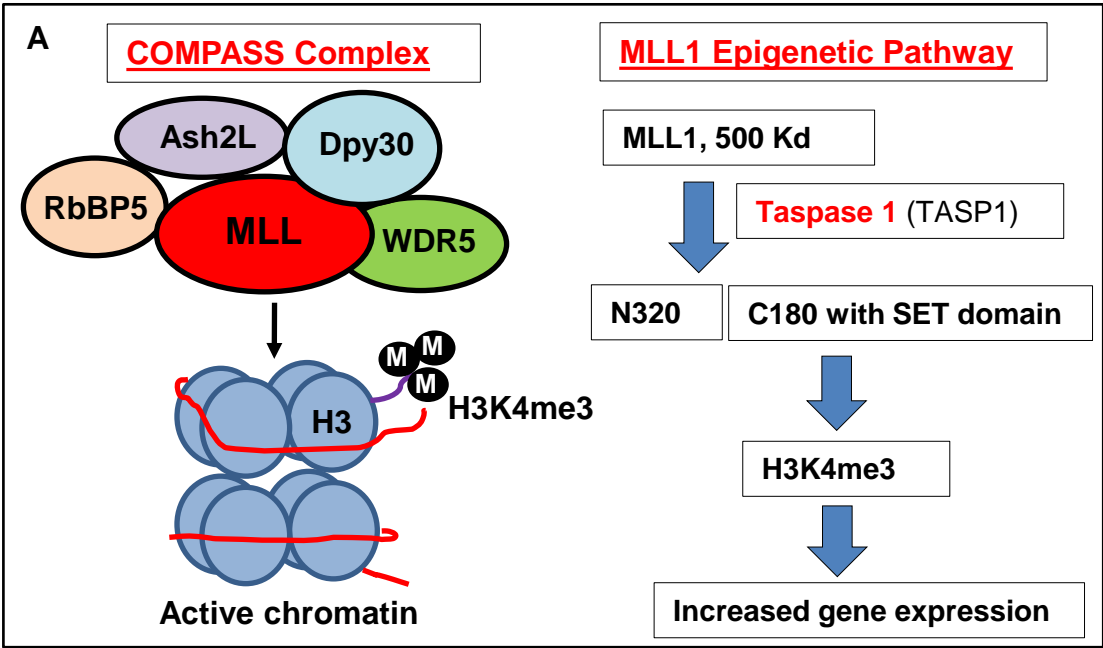

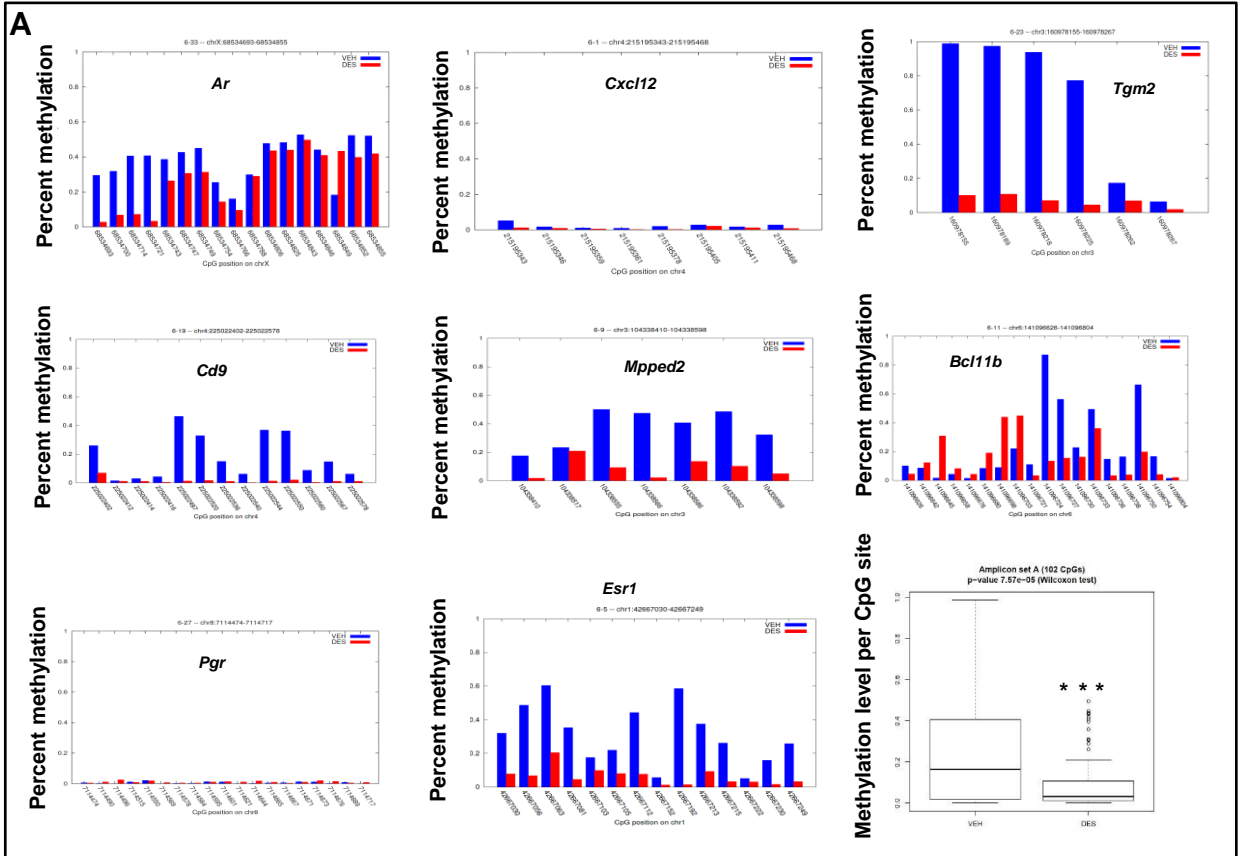

## Peaks/methylation near DES-regulated genes

Strict definition: 4me3 or RRBS in one direction only, not mixed

Gene body +/- 10 kb

| <b>expected direction</b>       |             |        | <b>opposite direction</b>       |             |        |
|---------------------------------|-------------|--------|---------------------------------|-------------|--------|
| <b>DES-upregulated genes</b>    | <b>1474</b> |        | <b>DES-upregulated genes</b>    | <b>1474</b> |        |
| RRBS down 10%                   | 467         | 31.68% | RRBS up 10%                     | 223         | 15.13% |
| RRBS down 33%                   | 377         | 25.58% | RRBS up 33%                     | 215         | 14.59% |
| RRBS down 50%                   | 174         | 11.80% | RRBS up 50%                     | 101         | 6.85%  |
| 4me3 up                         | 694         | 47.08% | 4me3 down                       | 90          | 6.11%  |
|                                 |             |        |                                 |             |        |
|                                 |             |        |                                 |             |        |
| <b>DES-down regulated genes</b> | <b>1448</b> |        | <b>DES-down regulated genes</b> | <b>1448</b> |        |
| RRBS up 10%                     | 173         | 11.95% | RRBS down 10%                   | 462         | 31.91% |
| RRBS up 33%                     | 147         | 10.15% | RRBS down 33%                   | 391         | 27.00% |
| RRBS up 50%                     | 80          | 5.52%  | RRBS down 50%                   | 180         | 12.43% |
| 4me3 down                       | 485         | 33.49% | 4me3 up                         | 157         | 10.84% |

| <b>mixed direction</b>          |             |        | <b>no mark</b>                  |             |        |
|---------------------------------|-------------|--------|---------------------------------|-------------|--------|
| <b>DES-upregulated genes</b>    | <b>1474</b> |        | <b>DES-upregulated genes</b>    | <b>1474</b> |        |
| RRBS both 10%                   | 327         | 22.18% | RRBS none 10%                   | 456         | 30.94% |
| RRBS both 33%                   | 111         | 7.53%  | RRBS none 33%                   | 769         | 52.17% |
| RRBS both 50%                   | 14          | 0.95%  | RRBS none 50%                   | 1183        | 80.26% |
| 4me3 both                       | 97          | 6.58%  | 4me3 none                       | 593         | 40.23% |
|                                 |             |        |                                 |             |        |
|                                 |             |        |                                 |             |        |
| <b>DES-down regulated genes</b> | <b>1448</b> |        | <b>DES-down regulated genes</b> | <b>1448</b> |        |
| RRBS both 10%                   | 331         | 22.86% | RRBS none 10%                   | 482         | 33.29% |
| RRBS both 33%                   | 123         | 8.49%  | RRBS none 33%                   | 787         | 54.35% |
| RRBS both 50%                   | 20          | 1.38%  | RRBS none 50%                   | 1168        | 80.66% |
| 4me3 both                       | 138         | 9.53%  | 4me3 none                       | 668         | 46.13% |

| <b>overlap between 4me3 &amp; RRBS</b> |             |        |
|----------------------------------------|-------------|--------|
| <b>DES-upregulated genes</b>           | <b>1474</b> |        |
| 4me3 up + RRBS down 10%                | 540         | 36.64% |
| 4me3 up + RRBS down 33%                | 340         | 23.07% |
| 4me3 up + RRBS down 50%                | 153         | 10.38% |
|                                        |             |        |
|                                        |             |        |
| <b>DES-down regulated genes</b>        | <b>1448</b> |        |
| 4me3 down + RRBS up 10%                | 279         | 19.27% |
| 4me3 down + RRBS up 33%                | 166         | 11.46% |
| 4me3 down + RRBS up 50%                | 76          | 5.25%  |
